# Supplementary material for: Contrasting patterns of litterfall seasonality and seasonal changes in litter decomposability in a tropical rainforest region
Source: Copernicus journal article supplement (doi:10.5194/bg-11-5047-2014), 2014-09-18
Supplement: Supplementary file 2 [file bg-11-5047-2014-supplement.zip]

| Subregion       | Plot name | Lat       | Long      | Deciduousness   | Mean month SL (total) |             | SL (decomp) | Mean decomp (wet season) | Mean decomp (dry season) | Mean annual litterfall rate (t/ha/yr) | Mean annual leaf decomposability (yr <sup>-1</sup> ) | Mean annual leaf litter phenolics (%) | Mean annual leaf litter lignin (%) | Mean annual leaf litter N (%) | Mean annual leaf litter P (%) | Mean annual leaf litter C (%) | Veg type   | Plant species richness | Tree species richness | Plant density | Early 2nd sp. | Elevation (m a.s.l.) | Mean annual temperature (°C) | Mean annual rainfall (mm) | Rainfall seasonality (sd monthly rainfall) | Mean annual radiation | Dry season moisture (ave. leaf wetness) | Soil N (%) | Soil P (%) | Soil Ca (%) | Soil Na (%) | Soil organic C (%) |       |
|-----------------|-----------|-----------|-----------|-----------------|-----------------------|-------------|-------------|--------------------------|--------------------------|---------------------------------------|------------------------------------------------------|---------------------------------------|------------------------------------|-------------------------------|-------------------------------|-------------------------------|------------|------------------------|-----------------------|---------------|---------------|----------------------|------------------------------|---------------------------|--------------------------------------------|-----------------------|-----------------------------------------|------------|------------|-------------|-------------|--------------------|-------|
|                 |           |           |           |                 | SL (leaf)             | SL (decomp) |             |                          |                          |                                       |                                                      |                                       |                                    |                               |                               |                               |            |                        |                       |               |               |                      |                              |                           |                                            |                       |                                         |            |            |             |             |                    |       |
| Atherton        | AU2A2     | -17.66251 | 145.87280 | Quasi-evergreen | January               | 0.16        | 0.04        | 0.12                     | 2.36                     | 2.17                                  | 11.39±5.09                                           | 2.25±0.34                             | 0.22±0.11                          | 33.02±4.56                    | 1.68±0.21                     | 0.07±0.01                     | 44.30±3.00 | MVF                    | 10                    | 4             | 15            | 30.8                 | 180                          | 22                        | 3379                                       | 77                    | 17.8                                    | 92.42      | 0.11       | 0.029       | 0.185       | 0.046              | 12.55 |
|                 | AU6A5     | -17.67609 | 145.71264 | Quasi-evergreen | December              | 0.24        | 0.19        | 0.08                     | 2.11                     | 2.06                                  | 5.97±0.84                                            | 2.08±0.36                             | 0.36±0.16                          | 33.73±3.23                    | 1.60±0.18                     | 0.05±0.01                     | 46.96±1.35 | NVF                    | 24                    | 14            | 64            | 14.5                 | 618                          | 20.5                      | 2920                                       | 69                    | 18.0                                    | 85.03      | 0.46       | 0.123       | 0.241       | 0.034              | 18.6  |
|                 | AU9A2     | -17.70167 | 145.52354 | Quasi-evergreen | November              | 0.26        | 0.30        | 0.07                     | 1.50                     | 1.50                                  | 9.19±3.78                                            | 1.5±0.31                              | 0.35±0.15                          | 35.64±3.03                    | 1.55±0.25                     | 0.04±0.01                     | 49.16±1.33 | NVF                    | 18                    | 9             | 31            | 17.2                 | 930                          | 19.1                      | 1864                                       | 77                    | 18.8                                    | 82.58      | 0.47       | 0.216       | 0.056       | 0.029              | 22.37 |
|                 | AU9A5     | -17.70635 | 145.52579 | Quasi-evergreen | November              | 0.31        | 0.40        | 0.05                     | 0.88                     | 0.95                                  | 5.58±0.85                                            | 0.92±0.29                             | 0.59±0.17                          | 35.31±3.51                    | 1.19±0.14                     | 0.02±0.01                     | 50.67±1.28 | NVF                    | 19                    | 10            | 29            | 0                    | 918                          | 23.9                      | 1993                                       | 96                    | 18.8                                    | 82.58      | 0.5        | 0.102       | 0.012       | 0.034              | 23.27 |
|                 | CU1A1     | -16.46942 | 145.32612 | Semi-deciduous  | February              | 0.11        | 0.22        | 0.17                     | 1.96                     | 1.64                                  | 5.47±0.95                                            | 1.77±0.35                             | 0.46±0.19                          | 32.22±3.12                    | 1.25±0.14                     | 0.03±0.01                     | 46.61±1.13 | MVF                    | 10                    | 3             | 26            | 0                    | 115                          | 23.6                      | 1899                                       | 97                    | 18.8                                    | 82.42      | 0.28       | 0.021       | 0.039       | 0.032              | 17.51 |
|                 | CU1A5     | -16.47154 | 145.32166 | Semi-deciduous  | December              | 0.06        | 0.27        | 0.12                     | 1.69                     | 1.71                                  | 6.69±1.02                                            | 1.7±0.44                              | 0.64±0.31                          | 29.69±5.73                    | 1.23±0.21                     | 0.03±0.01                     | 47.59±1.71 | MVF                    | 14                    | 6             | 26            | 0                    | 162                          | 23.1                      | 1772                                       | 97                    | 18.9                                    | 82.42      | 0.21       | 0.033       | 0.1         | 0.025              | 18.84 |
|                 | CU2A2     | -16.49256 | 145.35899 | Semi-deciduous  | February              | 0.14        | 0.29        | 0.15                     | 1.23                     | 0.93                                  | 9.43±3.67                                            | 1.05±0.43                             | 0.66±0.23                          | 38.69±5.56                    | 1.16±0.16                     | 0.03±0.01                     | 48.92±1.38 | MVF                    | ND                    | ND            | ND            | ND                   | 234                          | 22.9                      | 1718                                       | 97                    | 19.0                                    | 67.78      | 0.26       | 0.026       | 0.028       | 0.028              | 18.75 |
|                 | CU2A5     | -16.49399 | 145.36126 | Semi-deciduous  | April                 | 0.09        | 0.20        | 0.16                     | 1.19                     | 0.90                                  | 7.29±2.03                                            | 1.01±0.35                             | 0.70±0.20                          | 34.75±4.89                    | 1.09±0.14                     | 0.02±0.01                     | 49.15±1.06 | MVF                    | ND                    | ND            | ND            | ND                   | 270                          | 22                        | 1597                                       | 97                    | 19.1                                    | 67.78      | 0.26       | 0.018       | 0.006       | 0.049              | 16.91 |
|                 | CU4A2     | -16.53451 | 145.37182 | Semi-deciduous  | December              | 0.24        | 0.32        | 0.14                     | 0.87                     | 0.79                                  | 7.80±2.01                                            | 0.83±0.40                             | 0.55±0.19                          | 38.84±5.68                    | 1.02±0.12                     | 0.02±0.01                     | 49.24±1.22 | MVF                    | 26                    | 10            | 54            | 10                   | 440                          | 22.1                      | 1567                                       | 98                    | 19.2                                    | 91.48      | 0.34       | 0.013       | 0.012       | 0.091              | 22.37 |
|                 | CU4A5     | -16.53708 | 145.36692 | Semi-deciduous  | December              | 0.27        | 0.28        | 0.12                     | 1.20                     | 1.13                                  | 6.75±2.25                                            | 1.17±0.37                             | 0.68±0.19                          | 37.10±4.04                    | 1.07±0.14                     | 0.02±0.01                     | 47.73±1.57 | MVF                    | 11                    | 10            | 22            | 0                    | 420                          | 20.8                      | 1494                                       | 95                    | 19.2                                    | 91.48      | 0.26       | 0.01        | 0.017       | 0.042              | 16.11 |
| Carbine Uplands | CU6A2     | -16.57925 | 145.30465 | Evergreen       | November              | 0.42        | 0.40        | 0.14                     | 1.28                     | 1.23                                  | 11.29±3.32                                           | 1.26±0.36                             | 0.47±0.13                          | 37.66±4.65                    | 1.28±0.19                     | 0.03±0.01                     | 49.20±1.71 | NVF                    | 9                     | 8             | 21            | 0                    | 656                          | 21                        | 1445                                       | 97                    | 19.2                                    | 76.39      | 0.24       | 0.026       | 0.014       | 0.051              | 8.27  |
|                 | CU6A5     | -16.57886 | 145.31009 | Evergreen       | December              | 0.46        | 0.43        | 0.19                     | 0.87                     | 0.94                                  | 7.58±0.96                                            | 0.91±0.38                             | 0.59±0.21                          | 37.02±4.51                    | 1.14±0.16                     | 0.02±0.01                     | 49.00±1.41 | NVF                    | 13                    | 5             | 41            | 0                    | 606                          | 19.8                      | 1719                                       | 90                    | 19.3                                    | 76.39      | 0.2        | 0.018       | 0.014       | 0.046              | 11.39 |
|                 | CU8A2     | -16.58797 | 145.29659 | Quasi-evergreen | November              | 0.34        | 0.30        | 0.17                     | 1.21                     | 1.11                                  | 5.45±0.90                                            | 1.15±0.37                             | 0.60±0.14                          | 36.91±3.34                    | 1.16±0.13                     | 0.02±0.01                     | 49.08±1.48 | NVF                    | 30                    | 17            | 79            | 0                    | 820                          | 19.9                      | 1720                                       | 90                    | 19.0                                    | 81.36      | 0.1        | 0.022       | 0.013       | 0.053              | 28.96 |
|                 | CU8A5     | -16.58551 | 145.30040 | Quasi-evergreen | November              | 0.36        | 0.28        | 0.12                     | 0.98                     | 1.01                                  | 6.84±1.97                                            | 0.99±0.35                             | 0.62±0.18                          | 39.37±4.41                    | 1.14±0.12                     | 0.02±0.01                     | 48.55±1.60 | NVF                    | 26                    | 19            | 63            | 14.8                 | 813                          | 18.8                      | 2137                                       | 84                    | 19.0                                    | 81.36      | 0.29       | 0.016       | 0.01        | 0.057              | 13.74 |
|                 | CU10A2    | -16.55723 | 145.27725 | Quasi-evergreen | December              | 0.16        | 0.24        | 0.08                     | 1.42                     | 1.24                                  | 7.66±1.24                                            | 1.32±0.33                             | 0.56±0.18                          | 35.35±2.72                    | 1.21±0.17                     | 0.02±0.01                     | 48.38±1.16 | NVF                    | 13                    | 5             | 30            | 20                   | 1016                         | 19.2                      | 1984                                       | 86                    | 18.6                                    | 84.9       | 0.13       | 0.047       | 0.02        | 0.075              | 5.42  |
|                 | CU10A5    | -16.55434 | 145.28034 | Quasi-evergreen | November              | 0.24        | 0.31        | 0.10                     | 1.61                     | 1.47                                  | 10.12±5.61                                           | 1.54±0.32                             | 0.43±0.18                          | 31.97±3.27                    | 1.14±0.22                     | 0.03±0.01                     | 47.63±1.45 | NVF                    | 14                    | 8             | 24            | 12.5                 | 943                          | 17.7                      | 2672                                       | 78                    | 18.7                                    | 84.9       | 0.26       | 0.039       | 0.019       | 0.052              | 7.61  |
|                 | CU12A2    | -16.51423 | 145.26954 | Evergreen       | December              | 0.14        | 0.25        | 0.10                     | 1.31                     | 1.28                                  | 6.00±2.18                                            | 1.29±0.42                             | 0.48±0.14                          | 35.13±3.77                    | 1.21±0.13                     | 0.03±0.01                     | 47.93±2.08 | MFF                    | 15                    | 10            | 45            | 35.6                 | 1210                         | 17.9                      | 2577                                       | 79                    | 18.2                                    | 80.33      | 0.13       | 0.039       | 0.01        | 0.038              | 7.71  |
|                 | CU12A5    | -16.51742 | 145.27294 | Evergreen       | November              | 0.32        | 0.33        | 0.09                     | 0.84                     | 0.80                                  | 7.58±2.20                                            | 0.82±0.31                             | 0.53±0.16                          | 37.54±3.29                    | 1.10±0.14                     | 0.03±0.01                     | 49.15±1.32 | MFF                    | 32                    | 21            | 68            | 0                    | 1172                         | 22.3                      | 1384                                       | 105                   | 18.3                                    | 80.33      | 0.17       | 0.035       | 0.015       | 0.027              | 21.72 |
|                 | SU35A1    | -19.01403 | 146.26588 | Semi-deciduous  | November              | 0.04        | 0.05        | 0.25                     | 0.97                     | 0.72                                  | 10.70±1.60                                           | 0.84±0.29                             | 0.87±0.33                          | 31.79±2.70                    | 1.15±0.12                     | 0.02±0.01                     | 48.84±1.19 | NVF                    | 12                    | 4             | 41            | 9.1                  | 334                          | 22.3                      | 1384                                       | 105                   | 19.3                                    | 67.77      | 0.26       | 0.018       | 0.042       | 0.033              | 10.37 |
|                 | SU35A2    | -19.01484 | 146.26540 | Semi-deciduous  | January               | 0.07        | 0.16        | 0.18                     | 1.10                     | 0.76                                  | 6.99±3.60                                            | 0.92±0.39                             | 0.82±0.24                          | 31.21±4.18                    | 1.19±0.14                     | 0.02±0.01                     | 48.51±1.19 | NVF                    | 15                    | 10            | 22            | 22                   | 342                          | 20.5                      | 1645                                       | 102                   | 19.3                                    | 67.77      | 0.25       | 0.018       | 0.082       | 0.029              | 9.68  |
| Windsor Uplands | SU6A2     | -19.00261 | 146.24308 | Semi-deciduous  | January               | 0.14        | 0.10        | 0.17                     | 0.41                     | 0.33                                  | 10.40±0.86                                           | 0.37±0.24                             | 0.74±0.17                          | 36.96±2.90                    | 1.03±0.13                     | 0.01±0.01                     | 51.10±1.18 | MOF                    | 11                    | 7             | 27            | 48.2                 | 671                          | 20.5                      | 1631                                       | 102                   | 19.1                                    | 78.29      | 0.41       | 0.009       | 0.049       | 0.027              | 34.23 |
|                 | SU6A3     | -19.00262 | 146.24153 | Semi-deciduous  | December              | 0.17        | 0.10        | 0.10                     | 0.35                     | 0.30                                  | 8.16±3.21                                            | 0.32±0.18                             | 0.74±0.14                          | 37.09±2.29                    | 1.03±0.12                     | 0.01±0.01                     | 51.36±1.00 | MOF                    | 8                     | 5             | 22            | 31.8                 | 661                          | 20.6                      | 1611                                       | 102                   | 19.1                                    | 78.29      | 0.14       | 0.008       | 0.228       | 0.033              | 20.23 |
|                 | SU8A2     | -19.01178 | 146.22302 | Quasi-evergreen | January               | 0.27        | 0.19        | 0.05                     | 1.23                     | 0.93                                  | 7.61±1.01                                            | 1.07±0.39                             | 0.65±0.25                          | 32.06±4.24                    | 1.06±0.19                     | 0.02±0.01                     | 48.10±1.36 | NVF                    | 10                    | 3             | 28            | 0                    | 840                          | 19.7                      | 2116                                       | 99                    | 18.7                                    | 68.31      | 0.44       | 0.013       | 0.009       | 0.035              | 3.2   |
|                 | SU8A3     | -19.01134 | 146.22140 | Quasi-evergreen | November              | 0.22        | 0.12        | 0.10                     | 1.16                     | 0.99                                  | 8.33±1.51                                            | 1.07±0.34                             | 0.63±0.24                          | 34.48±4.30                    | 1.15±0.17                     | 0.02±0.01                     | 48.70±1.06 | NVF                    | 15                    | 7             | 26            | 0                    | 834                          | 19.8                      | 2041                                       | 100                   | 18.7                                    | 68.31      | 0.42       | 0.037       | 0.029       | 0.038              | 14.31 |
|                 | SU10A1    | -19.01569 | 146.15677 | Evergreen       | December              | 0.34        | 0.25        | 0.04                     | 1.12                     | 1.05                                  | 6.83±1.14                                            | 1.08±0.35                             | 0.63±0.21                          | 32.59±3.74                    | 1.38±0.21                     | 0.03±0.01                     | 50.38±1.44 | A-CF                   | 12                    | 7             | 20            | 0                    | 979                          | 18.9                      | 2426                                       | 96                    | 18.5                                    | 74.13      | 0.43       | 0.011       | 0.026       | 0.028              | 22.1  |
|                 | SU10A2    | -19.01581 | 146.15836 | Evergreen       | December              | 0.31        | 0.18        | 0.03                     | 1.13                     | 1.01                                  | 6.86±1.76                                            | 1.07±0.3                              | 0.64±0.21                          | 33.16±4.04                    | 1.34±0.18                     | 0.03±0.01                     | 50.49±1.11 | A-CF                   | 7                     | 6             | 16            | 0                    | 963                          | 19                        | 2393                                       | 96                    | 18.5                                    | 74.13      | 0.6        | 0.022       | 0.018       | 0.022              | 15.18 |
|                 | WU9A2     | -16.28467 | 145.08403 | Semi-deciduous  | October               | 0.21        | 0.44        | 0.17                     | 0.99                     | 0.87                                  | 5.79±1.83                                            | 0.92±0.38                             | 0.81±0.20                          | 33.57±3.91                    | 1.23±0.16                     | 0.03±0.01                     | 50.02±1.19 | NVF-AG                 | 13                    | 5             | 40            | 4.2                  | 940                          | 19.1                      | 1946                                       | 87                    | 18.8                                    | 76.33      | 0.11       | 0.016       | 0.023       | 0.022              | 10.18 |
|                 | WU9A5     | -16.28550 | 145.08896 | Semi-deciduous  | November              | 0.13        | 0.44        | 0.22                     | 1.08                     | 0.83                                  | 7.82±2.39                                            | 0.93±0.37                             | 0.73±0.20                          | 34.03±3.22                    | 1.22±0.18                     | 0.03±0.01                     | 49.31±2.46 | NVF-AG                 | 13                    | 9             | 24            | 14.8                 | 914                          | 19.3                      | 1909                                       | 87                    | 18.8                                    | 76.33      | 0.14       | 0.018       | 0.023       | 0.022              | 12.15 |
|                 | WU11A2    | -16.25942 | 145.04361 | Evergreen       | April                 | 0.20        | 0.39        | 0.14                     | 1.45                     | 1.32                                  | 6.11±1.70                                            | 1.37±0.37                             | 0.41±0.17                          | 36.10±3.32                    | 1.34±0.27                     | 0.03±0.01                     | 48.33±1.07 | NVF                    | 14                    | 7             | 27            | 42.5                 | 1071                         | 18.5                      | 2153                                       | 84                    | 18.6                                    | 86.14      | 0.15       | 0.028       | 0.097       | 0.027              | 9.88  |
|                 | WU11A5    | -16.25917 | 145.04959 | Evergreen       | December              | 0.30        | 0.42        | 0.13                     | 1.21                     | 1.13                                  | 8.79±3.42                                            | 1.16±0.38                             | 0.49±0.16                          | 38.69±4.32                    | 1.20±0.16                     | 0.03±0.01                     | 48.96±1.12 | NVF                    | 16                    | 7             | 27            | 18.5                 | 1080                         | 18.4                      | 2181                                       | 84                    | 18.6                                    | 86.14      | 0.15       | 0.024       | 0.018       | 0.02               | 18.45 |
| WU13A2          | -16.23554 | 145.00882 | Evergreen | November        | 0.26                  | 0.43        | 0.24        | 0.87                     | 0.69                     | 5.93±2.57                             | 0.75±0.39                                            | 0.72±0.18                             | 34.75±3.91                         | 1.04±0.23                     | 0.01±0.01                     | 50.78±0.90                    | MFF        | 21                     | 15                    | 48            | 2.1           | 1280                 | 17.4                         | 2546                      | 80                                         | 18.3                  | 66.53                                   | 0.17       | 0.014      | 0.01        | 0.02        | 14.16              |       |
| WU13A5          | -16.23115 | 145.00777 | Evergreen | October         | 0.28                  | 0.48        | 0.17        | 0.98                     | 0.85                     | 7.16±2.43                             | 0.9±0.36                                             | 0.73±0.19                             | 34.79±3.19                         | 1.05±0.16                     | 0.02±0.01                     | 49.53±1.25                    | MFF        | 21                     | 13                    | 35            | 0             | 1260                 | 17.5                         | 2505                      | 81                                         | 18.3                  | 66.53                                   | 0.14       | 0.019      | 0.039       | 0.028       | 25.06              |       |

All errors are sd of monthly estimates. S: CS = recent cyclone damage; CMVF complex mesophyll vine forest; MVF = mesophyll vine forest; NVF = notophyll vine forest;

MFF = microphyll fera forest; MOF = medium open forest with regenerating rainforest understorey; A-CF = Acacia sp. closed forest; NVF-AG = notophyll vine forest with
