# Supplementary material for: Contrasting patterns of litterfall seasonality and seasonal changes in litter decomposability in a tropical rainforest region
Source: Copernicus journal article supplement (doi:10.5194/bg-11-5047-2014), 2014-09-18
Supplement: Supplementary file 4 [file bg-11-5047-2014-supplement.zip]

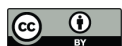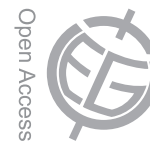

*Supplement of*

**Contrasting patterns of litterfall seasonality and seasonal changes in litter decomposability in a tropical rainforest region**

**S. A. Parsons et al.**

*Correspondence to:* S. A. Parsons ([scottanthonyparsons@gmail.com](mailto:scottanthonyparsons@gmail.com))

- Supplement-Cover-Letter.pdf
- Fig S1.pdf
- Table S1.pdf
- \_\_MACOSX
  - .\_Fig S1.pdf
  - .\_Table S1.pdf
