# Supplementary figures and images for: Contrasting patterns of litterfall seasonality and seasonal changes in litter decomposability in a tropical rainforest region
Source: Copernicus journal article supplement (doi:10.5194/bg-11-5047-2014), 2014-09-18

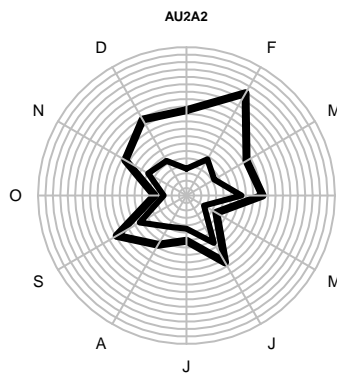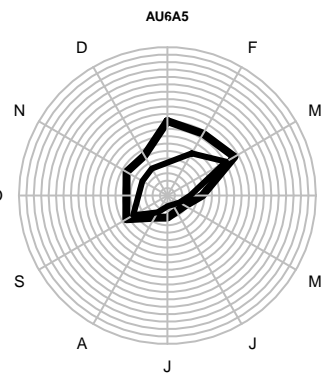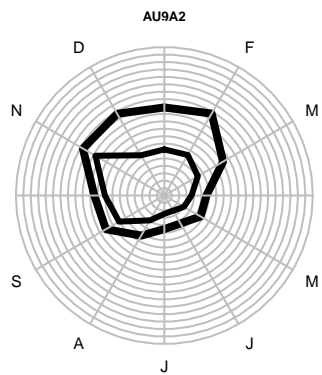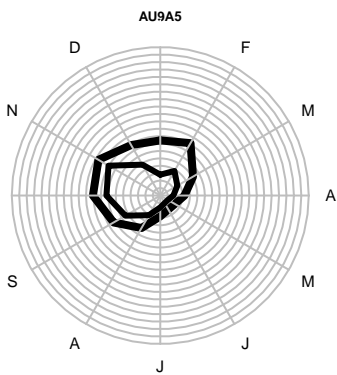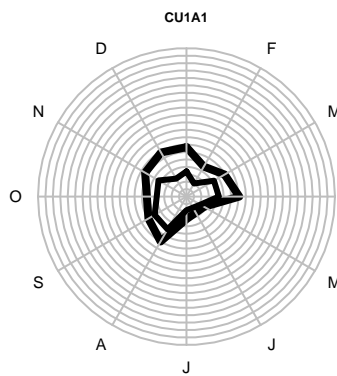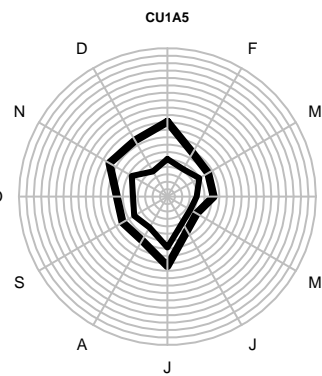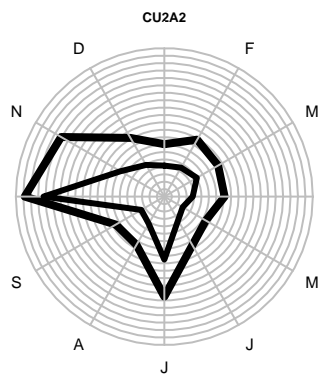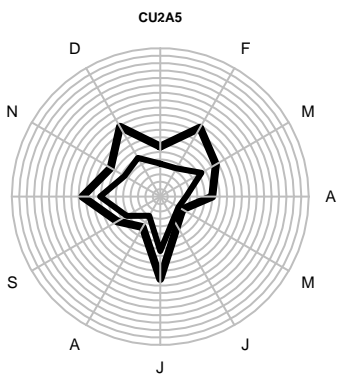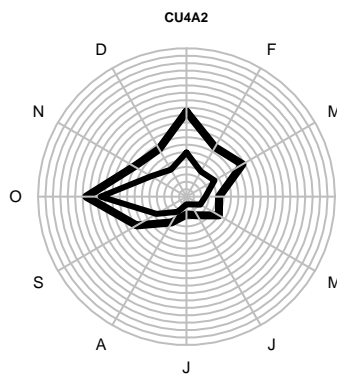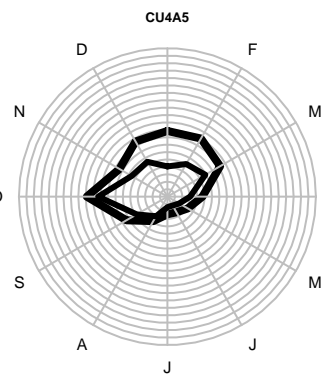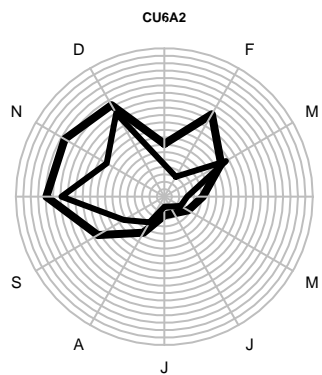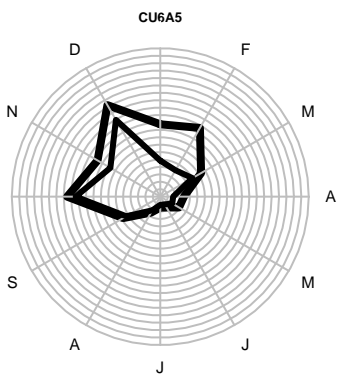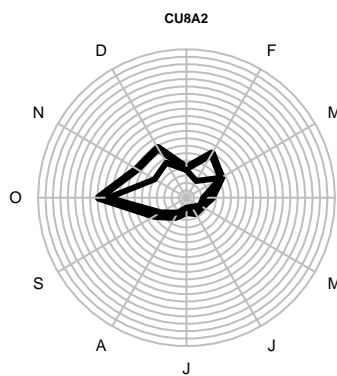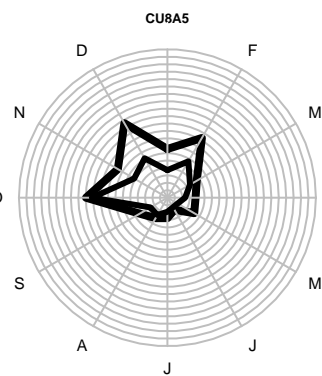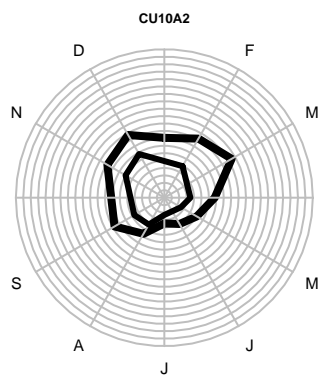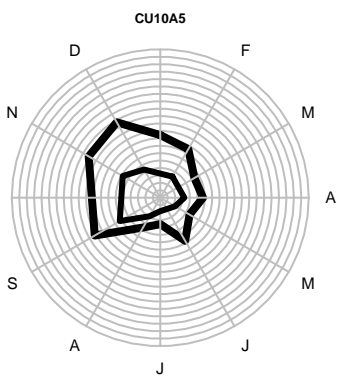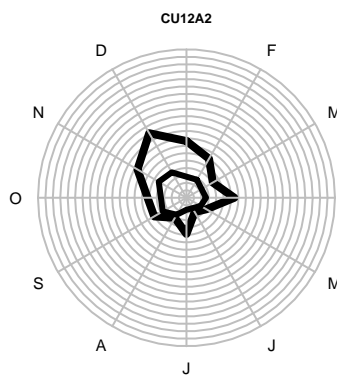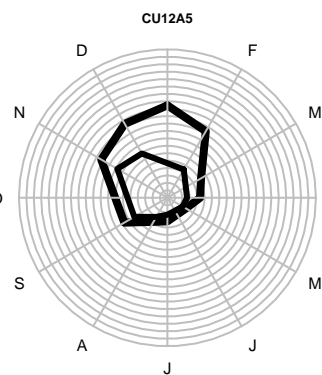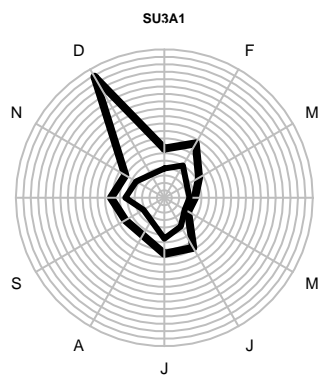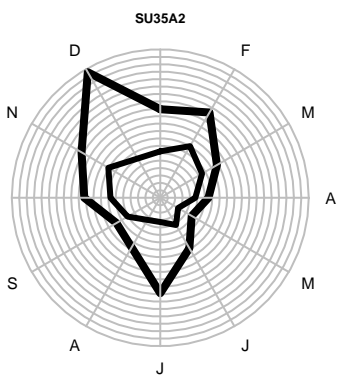

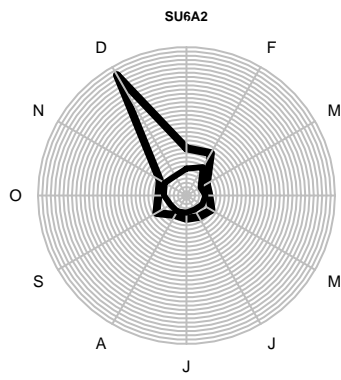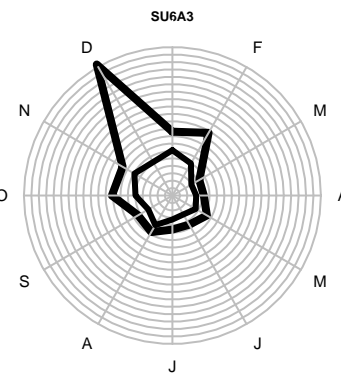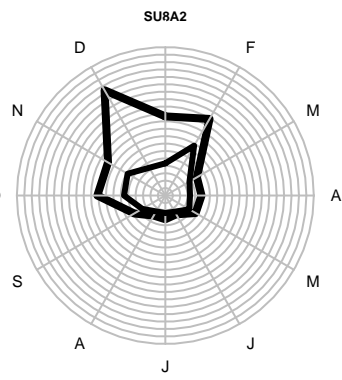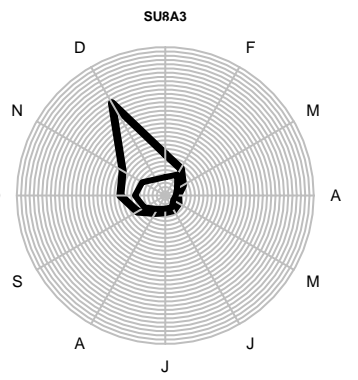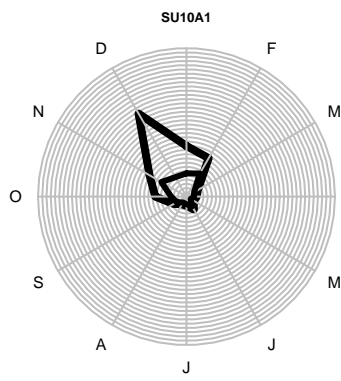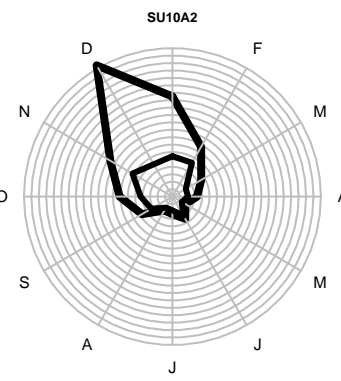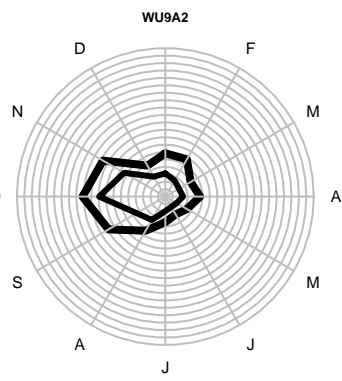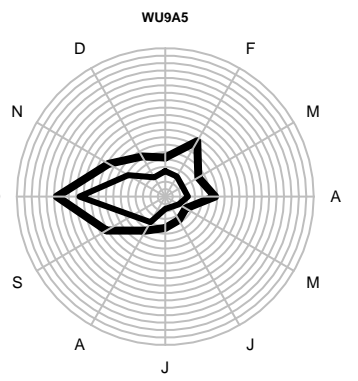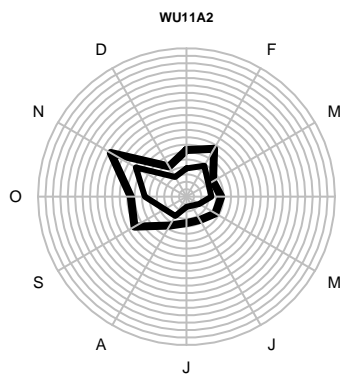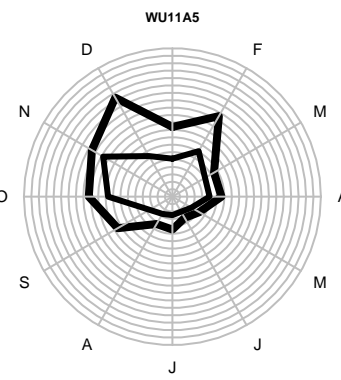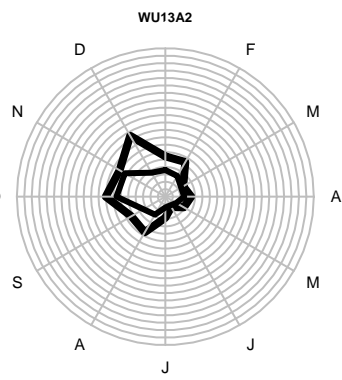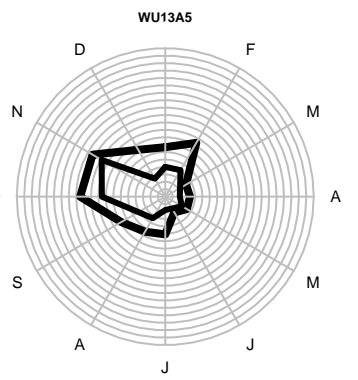

Supplement: Supplementary file 5 [file bg-11-5047-2014-supplement.zip]
